# Supplementary material
Source: HighWire-hosted journal article supplement (https://www.jpn.ca/content/suppl/2021/09/19/43.6.407)
Supplement: jpn-170141-1-at.pdf [file jpn-170141-1-at.pdf]

**Appendix 1** to Rappaport LM, Russell JJ, Hedeker D, Pinard G, Bleau P, Moskowitz DS. Affect, interpersonal behavior and interpersonal perception during open-label, uncontrolled paroxetine treatment of people with social anxiety disorder: a pilot study. *J Psychiatry Neurosci* 2018.

DOI: 10.1503/jpn.170141

Copyright © 2018 The Author(s) or their employer(s). To receive this resource in an accessible format, please contact us at [cmajgroup@cmaj.ca](mailto:cmajgroup@cmaj.ca). *Online appendices are unedited and posted as supplied by the authors.*

### Design

Participants received \$20 compensation after participation in the 7-day pre-treatment baseline ECR period, \$150 after 8 weeks of treatment, and an additional \$150 at the last session following 16 weeks of treatment.

### Data analysis

For growth curve models of change in symptom severity and spin, higher-order polynomials were added successively as fixed then random effects to best model change over time.

Drawn from Hedeker and Mermelstein (2012), 3-level Location-Scale models were run using maximum likelihood estimation with adaptive Gaussian-Hermite quadrature with at least 3 quadrature points. Higher-order polynomials were added successively to best model change in mean level (i.e., location) and intraindividual variability (i.e., variance, scale) over time. Random effects were subsequently added to evaluate inter-individual heterogeneity in mean level and intraindividual variability at baseline and in the trajectory of mean level. Mixed effects models are limited in producing standardized estimates. Instead, unstandardized estimates are presented with 95% confidence intervals.

Each variable is distributed as  $N(y_{ijk}, \sigma_{ijk}^2)$  for observation  $k$  in wave  $j$  for person  $i$ .

Fixed Effects:

$$y_{ijk} = (\beta_0 + v_{0i} + v_{0ij}) + (\beta_1 + v_{1i}) * Session_{ij} + \beta_2 * Session_{ij}^2 + \beta_3 * Session_{ij}^3 + \epsilon_{ijk}$$

$$\sigma_{ijk}^2 = exp(\tau_0 + \tau_1 * Session_{ij} + \omega_i)$$

Random Effects:

$$v_{0i}, v_{0ij}, v_{1i}, \omega_i \sim N \left( 0, \begin{pmatrix} \sigma_{v_0}^2 & 0 & \sigma_{v_0 v_1} & \sigma_{v_0 \omega} \\ 0 & \sigma_{v_0 \wedge wave}^2 & 0 & 0 \\ \sigma_{v_0 v_1} & 0 & \sigma_{v_1}^2 & 0 \\ \sigma_{v_0 \omega} & 0 & 0 & \sigma_{\omega}^2 \end{pmatrix} \right)$$

**Appendix 1** to Rappaport LM, Russell JJ, Hedeker D, Pinard G, Bleau P, Moskowitz DS. Affect, interpersonal behavior and interpersonal perception during open-label, uncontrolled paroxetine treatment of people with social anxiety disorder: a pilot study. *J Psychiatry Neurosci* 2018.

DOI: 10.1503/jpn.170141

*Online appendices are unedited and posted as supplied by the authors.*

Example code:

```
PROC NL MIXED data=ECR MAXITER=1000 GCONV=1e-12 EBOPT ITDETAILS;
  BOUNDS v0 vs vwave v1 > 0;
  mean = (b0 + u0) + (b1 + u1)*Session + b2*Sessionq
        + d1*w1 + d2*w2 + d3*w3 + d4*w4 + d5*w5;
  vare = EXP(t0 + t1*Session + omega);
  MODEL MNAFXINT ~ NORMAL(mean,vare);
  RANDOM u0 u1 omega d1 d2 d3 d4 d5 ~ NORMAL([0,0,0,0,0,0,0],
        [v0,
        c01,v1,
        c0s,0,vs,
        0,0,0,vwave,
        0,0,0,0,vwave,
        0,0,0,0,0,vwave,
        0,0,0,0,0,0,vwave,
        0,0,0,0,0,0,vwave]) SUBJECT=ID;
  PREDICT mean out=NAmean;
  PREDICT vare out=NAvare;
  TITLE '3-level location-scale model for Negative Affect';
run;
```

## Results

**Change in Symptoms.** Two items on the SIAS are reverse-coded. Internal consistency was high at each time point when the 2 reverse-coded items are included ( $\alpha = 0.86 - 0.91$ ) or excluded ( $\alpha = 0.85 - 0.91$ ). Additionally, a univariate growth curve was fit to model change in SIAS symptom severity when computed with the 2 reverse-coded items. Anxiety, as indexed by the SIAS total score, decreased in a monotonically downward pattern,  $B_{linear\ slope} = -18.80$ , 95% CI [-22.62, -14.98],  $p < 0.0001$ , with deceleration over time,  $B_{quadratic\ slope} = 2.05$ , 95% CI [1.45, 2.65],  $p < 0.0001$ . Results were highly similar to those based on the SIAS total score excluding the 2 reverse-coded items, which are presented in the text.

**Correlates of Anxiety Symptomatology.** Anxiety symptoms were assessed monthly, prior to each ECR period. Higher anxiety symptom severity was associated with higher mean negative affect, higher submissive behavior, lower dominant behavior, and lower perception of warmth in others' behavior during the following week (see Supplemental Tables 4 & 5, Within-Person).

**Appendix 1** to Rappaport LM, Russell JJ, Hedeker D, Pinard G, Bleau P, Moskowitz DS. Affect, interpersonal behavior and interpersonal perception during open-label, uncontrolled paroxetine treatment of people with social anxiety disorder: a pilot study. *J Psychiatry Neurosci* 2018.

DOI: 10.1503/jpn.170141

*Online appendices are unedited and posted as supplied by the authors.*

Additionally, higher anxiety symptom severity was associated with greater intraindividual variability in negative affect, submissive behavior, and perception of warmth in others' behavior. Associations were consistent across at least 2 of 3 self- and clinician-reported assessments included in the study. Person-level results suggest that, after removing change over time, participants who, over the course of the study, reported higher average anxiety symptom severity also demonstrated, on average, higher negative affect, lower dominant behavior, and higher submissive behavior along with greater intraindividual variability in negative affect (see Supplemental Tables 4 & 5, Between-Person).

Supplemental Table 1. Change in Anxiety and Depressive Symptom Severity over Treatment

|                 | <i>Fixed Effects</i> |                  | <i>Random Effects</i>                   |
|-----------------|----------------------|------------------|-----------------------------------------|
|                 | <i>B</i>             | <i>CI</i>        | <i>Variance (<math>\sigma^2</math>)</i> |
| <u>LSAS</u>     |                      |                  |                                         |
| Intercept       | 116.38 ^             | (106.31, 126.45) | 185.21                                  |
| Linear Slope    | -35.52 ^             | (-43.06, -27.97) | 21.37                                   |
| Quadratic Slope | 4.03 ^               | (2.81, 5.25)     | --                                      |
| <u>SPS</u>      |                      |                  |                                         |
| Intercept       | 61.85 ^              | (55.65, 68.05)   | 190.38 ***                              |
| Linear Slope    | -18.26 ^             | (-22.19, -14.33) | 14.00 **                                |
| Quadratic Slope | 2.01 ^               | (1.39, 2.63)     | --                                      |
| <u>SIAS</u>     |                      |                  |                                         |
| Intercept       | 63.96 ^              | (59.16, 68.76)   | 43.76 *                                 |
| Linear Slope    | -17.67 ^             | (-21.34, -14.01) | 10.89 **                                |
| Quadratic Slope | 1.92 ^               | (1.34, 2.50)     | --                                      |
| <u>MADRS</u>    |                      |                  |                                         |
| Intercept       | 9.74 ^               | (6.91, 12.57)    | 5.49 *                                  |
| Linear Slope    | -3.07 **             | (-5.25, -0.89)   | --                                      |
| Quadratic Slope | 0.34                 | (-0.02, 0.70)    | --                                      |

Note. LSAS = Liebowitz Social Anxiety Scale; SPS = Social Phobia; SIAS = Social Interaction and Anxiety Scale; MADRS = Montgomery-Åsberg Depression Rating Scale; CI = 95% Confidence Interval. \*  $p \leq 0.05$ , \*\*  $p \leq 0.01$ , \*\*\*  $p \leq 0.001$ , ^  $p \leq 0.0001$ .

**Appendix 1** to Rappaport LM, Russell JJ, Hedeker D, Pinard G, Bleau P, Moskowitz DS. Affect, interpersonal behavior and interpersonal perception during open-label, uncontrolled paroxetine treatment of people with social anxiety disorder: a pilot study. *J Psychiatry Neurosci* 2018.

DOI: 10.1503/jpn.170141

*Online appendices are unedited and posted as supplied by the authors.*

Supplemental Table 2. Change in Affect (Positive and Negative) and Perception (Warmth and Dominance) Mean (i.e., Location) and Variance (i.e., Scale) over Treatment

|                           | Positive Affect      |                | Negative Affect         |                |
|---------------------------|----------------------|----------------|-------------------------|----------------|
| Mean                      | $B/\sigma^2$         | CI             | $B/\sigma^2$            | CI             |
| Intercept                 | 2.21 <sup>^</sup>    | (1.89, 2.52)   | 1.32 <sup>^</sup>       | (1.12, 1.51)   |
| Linear Slope              | 0.47 <sup>^</sup>    | (0.29, 0.65)   | -0.51 <sup>^</sup>      | (-0.62, -0.39) |
| Quad Slope                | -0.08 <sup>***</sup> | (-0.13, -0.04) | 0.08 <sup>^</sup>       | (0.06, 0.11)   |
| $\sigma^2_{int}$          | 0.96 <sup>^</sup>    | --             | 0.36 <sup>^</sup>       | --             |
| $\sigma^2_{betweenWave}$  | 0.14 <sup>^</sup>    | --             | 0.05 <sup>^</sup>       | --             |
| $\sigma^2_{slope}$        | 0.04 <sup>*</sup>    | --             | 0.02 <sup>**</sup>      | --             |
| COV <sub>int, slope</sub> | 0.004                | --             | -0.05 <sup>*</sup>      | --             |
| Variance                  | $B/\sigma^2$         | CI             | $B/\sigma^2$            | CI             |
| Intercept                 | 0.18                 | (-0.01, 0.37)  | -0.18                   | (-0.49, 0.13)  |
| Linear Slope              | -0.15 <sup>^</sup>   | (-0.19, -0.11) | -0.47 <sup>^</sup>      | (-0.51, -0.44) |
| $\sigma^2_{scale}$        | 0.36 <sup>^</sup>    | --             | 1.07 <sup>^</sup>       | --             |
| COV <sub>int, scale</sub> | 0.06                 | --             | 0.44 <sup>^</sup>       | --             |
|                           | Perception of Warmth |                | Perception of Dominance |                |
| Mean                      | $B/\sigma^2$         | CI             | $B/\sigma^2$            | CI             |
| Intercept                 | 7.39 <sup>^</sup>    | (7.02, 7.75)   | 7.63 <sup>^</sup>       | (7.37, 7.88)   |
| Linear Slope              | 0.67 <sup>^</sup>    | (0.41, 0.93)   | --                      | --             |
| Quad Slope                | -0.10 <sup>**</sup>  | (-0.16, -0.04) | --                      | --             |
| $\sigma^2_{int}$          | 1.11 <sup>***</sup>  | --             | 0.57 <sup>***</sup>     | --             |
| $\sigma^2_{betweenWave}$  | 0.15 <sup>*</sup>    | --             | 0.37 <sup>^</sup>       | --             |
| $\sigma^2_{slope}$        | 0.08 <sup>*</sup>    | --             | --                      | --             |
| COV <sub>int, slope</sub> | -0.13                | --             | --                      | --             |
| Variance                  | $B/\sigma^2$         | CI             | $B/\sigma^2$            | CI             |
| Intercept                 | 1.76 <sup>^</sup>    | (1.56, 1.97)   | 1.56 <sup>^</sup>       | (1.36, 1.77)   |
| Linear Slope              | -0.18 <sup>^</sup>   | (-0.22, -0.14) | -0.23 <sup>^</sup>      | (-0.27, -0.19) |
| $\sigma^2_{scale}$        | 0.41 <sup>^</sup>    | --             | 0.39 <sup>^</sup>       | --             |

**Appendix 1** to Rappaport LM, Russell JJ, Hedeker D, Pinard G, Bleau P, Moskowitz DS. Affect, interpersonal behavior and interpersonal perception during open-label, uncontrolled paroxetine treatment of people with social anxiety disorder: a pilot study. *J Psychiatry Neurosci* 2018.

DOI: 10.1503/jpn.170141

*Online appendices are unedited and posted as supplied by the authors.*

COV<sub>int, scale</sub>      -0.33\*\*      --      -0.19\*      --

Note.  $\sigma^2_{int}$  = variance between persons in intercept of the mean;  $\sigma^2_{betweenWave}$  = variance within persons between assessments waves (i.e., months);  $\sigma^2_{slope}$  = variance between persons in linear slope over time; COV<sub>int, slope</sub> = covariance of between persons random intercept and slope;  $\sigma^2_{scale}$  = variance between persons in intercept of the variance; COV<sub>int, scale</sub> = covariance of between persons random intercept for mean with random intercept for the variance; CI = 95% Confidence Interval. \*  $p \leq 0.05$ , \*\*  $p \leq 0.01$ , \*\*\*  $p \leq 0.001$ , ^  $p \leq 0.0001$ .

Supplemental Table 3. Change in Communal and Agentic Behavior Mean (i.e., Location) and Variance (i.e., Scale) over Treatment

|                           | Agreeable Behavior |                | Quarrelsome Behavior |                  |
|---------------------------|--------------------|----------------|----------------------|------------------|
| Mean                      | $B/\sigma^2$       | CI             | $B/\sigma^2$         | CI               |
| Intercept                 | 11.83 <sup>^</sup> | (9.36, 14.29)  | -15.21 <sup>^</sup>  | (-17.58, -12.83) |
| Linear Slope              | 5.22 <sup>^</sup>  | (2.94, 7.51)   | -1.82*               | (-3.47, -0.17)   |
| Quad Slope                | -1.06***           | (-1.62, -0.50) | 0.40*                | (-0.003, 0.81)   |
| $\sigma^2_{int}$          | 40.99**            | --             | 46.77***             | --               |
| $\sigma^2_{betweenWave}$  | 7.85               | --             | 2.97                 | --               |
| $\sigma^2_{slope}$        | 4.38               | --             | 0.70                 | --               |
| COV <sub>int, slope</sub> | 1.10               | --             | -0.59                | --               |
| Variance                  | $B/\sigma^2$       | CI             | $B/\sigma^2$         | CI               |
| Intercept                 | 6.3- <sup>^</sup>  | (6.22, 6.39)   | 6.00 <sup>^</sup>    | (5.84, 6.16)     |
| Linear Slope              | -0.05**            | (-0.08, -0.01) | -0.09 <sup>^</sup>   | (-0.13, -0.06)   |
| $\sigma^2_{scale}$        | 0.03*              | --             | 0.23***              | --               |
| COV <sub>int, scale</sub> | -0.65*             | --             | 1.46*                | --               |
|                           | Dominant Behavior  |                | Submissive Behavior  |                  |
| Mean                      | $B/\sigma^2$       | CI             | $B/\sigma^2$         | CI               |
| Intercept                 | -0.88              | (-3.68, 1.92)  | 3.83*                | (0.47, 7.18)     |
| Linear Slope              | 2.21 <sup>^</sup>  | (1.27, 3.15)   | -14.28 <sup>^</sup>  | (-20.05, -8.51)  |
| Quad Slope                | --                 | --             | 6.18**               | (2.45, 9.91)     |
| Cubic Slope               | --                 | --             | -0.88**              | (-1.50, -0.25)   |
| $\sigma^2_{int}$          | 63.35**            | --             | 79.80***             | --               |
| $\sigma^2_{betweenWave}$  | 14.01**            | --             | 19.47**              | --               |

**Appendix 1** to Rappaport LM, Russell JJ, Hedeker D, Pinard G, Bleau P, Moskowitz DS. Affect, interpersonal behavior and interpersonal perception during open-label, uncontrolled paroxetine treatment of people with social anxiety disorder: a pilot study. *J Psychiatry Neurosci* 2018.

DOI: 10.1503/jpn.170141

*Online appendices are unedited and posted as supplied by the authors.*

|                                  |                                |                |                                |                |
|----------------------------------|--------------------------------|----------------|--------------------------------|----------------|
| $\sigma^2_{\text{slope}}$        | 3.12                           | --             | 6.76*                          | --             |
| $\text{COV}_{\text{int, slope}}$ | -4.28                          | --             | -9.19                          | --             |
| <b>Variance</b>                  | <b><math>B/\sigma^2</math></b> | <b>CI</b>      | <b><math>B/\sigma^2</math></b> | <b>CI</b>      |
| Intercept                        | 6.30 <sup>^</sup>              | (6.20, 6.39)   | 6.52 <sup>^</sup>              | (6.41, 6.64)   |
| Linear Slope                     | -0.06 <sup>**</sup>            | (-0.09, -0.02) | -0.15 <sup>^</sup>             | (-0.19, -0.12) |
| $\sigma^2_{\text{scale}}$        | 0.04 <sup>**</sup>             | --             | 0.10 <sup>**</sup>             | --             |
| $\text{COV}_{\text{int, scale}}$ | 0.38                           | --             | 1.63 <sup>**</sup>             | --             |

Note.  $\sigma^2_{\text{int}}$  = variance between persons in intercept of the mean;  $\sigma^2_{\text{betweenWave}}$  = variance within persons between assessments waves (i.e., months);  $\sigma^2_{\text{slope}}$  = variance between persons in linear slope over time;  $\text{COV}_{\text{int, slope}}$  = covariance of between persons random intercept and slope;  $\sigma^2_{\text{scale}}$  = variance between persons in intercept of the variance;  $\text{COV}_{\text{int, scale}}$  = covariance of between persons random intercept for mean with random intercept for the variance; CI = 95% Confidence Interval. \*  $p \leq 0.05$ , \*\*  $p \leq 0.01$ , \*\*\*  $p \leq 0.001$ , <sup>^</sup>  $p \leq 0.0001$ .

**Appendix 1** to Rappaport LM, Russell JJ, Hedeker D, Pinard G, Bleau P, Moskowitz DS. Affect, interpersonal behavior and interpersonal perception during open-label, uncontrolled paroxetine treatment of people with social anxiety disorder: a pilot study. *J Psychiatry Neurosci* 2018.

DOI: 10.1503/jpn.170141

*Online appendices are unedited and posted as supplied by the authors.*

Supplemental Table 4. Concurrent Association of Anxiety Symptomatology with Affect and Perception (*B* [95% CI])

|                       | Positive Affect           |                          | Negative Affect          |                          |
|-----------------------|---------------------------|--------------------------|--------------------------|--------------------------|
|                       | Mean                      | Variance                 | Mean                     | Variance                 |
| <b>Within-Person</b>  |                           |                          |                          |                          |
| LSAS                  | -0.003 (-0.009, 0.002)    | -0.0002 (-0.003, 0.003)  | 0.003 (-0.0001, 0.007) + | 0.007 (0.003, 0.010) *** |
| SPS                   | -0.009 (-0.019, 0.002)    | 0.003 (-0.003, 0.009)    | 0.014 (-0.008, 0.020) ^  | 0.030 (0.024, 0.036) ^   |
| SIAS                  | -0.012 (-0.023, -0.001) * | 0.004 (-0.002, 0.010)    | 0.012 (0.005, 0.019) *** | 0.025 (0.019, 0.032) ^   |
| <b>Between-Person</b> |                           |                          |                          |                          |
| LSAS                  | -0.004 (-0.018, 0.011)    | 0.001 (-0.008, 0.010)    | 0.010 (0.004, 0.017) **  | 0.020 (0.007, 0.034) **  |
| SPS                   | 0.007 (-0.015, 0.029)     | 0.008 (-0.005, 0.021)    | 0.018 (0.008, 0.028) **  | 0.037 (0.016, 0.058) *** |
| SIAS                  | -0.009 (-0.035, 0.017)    | 0.001 (-0.015, 0.017)    | 0.019 (0.007, 0.031) **  | 0.041 (0.017, 0.065) *** |
|                       | Perception of Warmth      |                          | Perception of Dominance  |                          |
|                       | Mean                      | Variance                 | Mean                     | Variance                 |
| <b>Within-Person</b>  |                           |                          |                          |                          |
| LSAS                  | -0.004 (-0.013, 0.004)    | 0.008 (0.004, 0.011) ^   | -0.004 (-0.010, 0.002)   | 0.003 (-0.001, 0.006)    |
| SPS                   | -0.017 (-0.032, -0.001) * | 0.010 (0.004, 0.015) **  | -0.004 (-0.014, 0.006)   | 0.002 (-0.004, 0.008)    |
| SIAS                  | -0.021 (-0.037, -0.005) * | 0.013 (0.007, 0.020) *** | -0.007 (-0.018, 0.003)   | 0.005 (-0.001, 0.012)    |
| <b>Between-Person</b> |                           |                          |                          |                          |
| LSAS                  | -0.004 (-0.019, 0.011)    | 0.006 (-0.003, 0.016)    | -0.003 (-0.015, 0.009)   | 0.004 (-0.005, 0.013)    |
| SPS                   | -0.018 (-0.040, 0.004)    | 0.016 (0.002, 0.029) *   | -0.009 (-0.027, 0.010)   | 0.007 (-0.006, 0.021)    |
| SIAS                  | -0.021 (-0.046, -0.005)   | 0.011 (-0.005, 0.028)    | -0.004 (-0.026, 0.017)   | -0.002 (-0.019, 0.014)   |

**Appendix 1** to Rappaport LM, Russell JJ, Hedeker D, Pinard G, Bleau P, Moskowitz DS. Affect, interpersonal behavior and interpersonal perception during open-label, uncontrolled paroxetine treatment of people with social anxiety disorder: a pilot study. *J Psychiatry Neurosci* 2018.

DOI: 10.1503/jpn.170141

*Online appendices are unedited and posted as supplied by the authors.*

Note. LSAS = Liebowitz Social Anxiety Scale; SPS = Social Phobia; SIAS = Social Interaction and Anxiety Scale; MADRS = Montgomery-Åsberg Depression Rating Scale; CI = 95% Confidence Interval. +  $p \leq 0.06$ , \*  $p \leq 0.05$ , \*\*  $p \leq 0.01$ , \*\*\*  $p \leq 0.001$ , ^  $p \leq 0.0001$ .



**Appendix 1** to Rappaport LM, Russell JJ, Hedeker D, Pinard G, Bleau P, Moskowitz DS. Affect, interpersonal behavior and interpersonal perception during open-label, uncontrolled paroxetine treatment of people with social anxiety disorder: a pilot study. *J Psychiatry Neurosci* 2018.

DOI: 10.1503/jpn.170141

*Online appendices are unedited and posted as supplied by the authors.*

Supplemental Table 5. Concurrent Association of Anxiety Symptomatology with Interpersonal Behavior (*B* [95% CI])

|                       | Agreeable Behavior          |                         | Quarrelsome Behavior      |                          |
|-----------------------|-----------------------------|-------------------------|---------------------------|--------------------------|
|                       | Mean                        | Variance                | Mean                      | Variance                 |
| <u>Within-Person</u>  |                             |                         |                           |                          |
| LSAS                  | -0.049 (-0.117, 0.019)      | -0.001 (-0.004, 0.002)  | 0.034 (-0.013, 0.082)     | 0.002 (-0.001, 0.005)    |
| SPS                   | -0.086 (-0.216, 0.043)      | 0.002 (-0.004, 0.007)   | 0.076 (-0.016, 0.169)     | 0.004 (-0.001, 0.009)    |
| SIAS                  | -0.136 (-0.273, 0.001) *    | -0.0004 (-0.006, 0.005) | 0.108 (0.009, 0.206) *    | 0.007 (0.001, 0.012) *   |
| <u>Between-Person</u> |                             |                         |                           |                          |
| LSAS                  | -0.081 (-0.192, 0.029)      | 0.002 (-0.002, 0.005)   | 0.004 (-0.105, 0.113)     | 0.001 (-0.007, 0.008)    |
| SPS                   | -0.117 (-0.281, 0.047)      | 0.005 (-0.0003, 0.010)  | 0.083 (-0.079, 0.244)     | 0.007 (-0.004, 0.017)    |
| SIAS                  | -0.109 (-0.304, 0.086)      | 0.005 (-0.002, 0.011)   | 0.051 (-0.140, 0.241)     | 0.011 (-0.001, 0.024)    |
|                       | Dominant Behavior           |                         | Submissive Behavior       |                          |
|                       | Mean                        | Variance                | Mean                      | Variance                 |
| <u>Within-Person</u>  |                             |                         |                           |                          |
| LSAS                  | -0.128 (-0.191, -0.066) *** | -0.002 (-0.005, 0.001)  | 0.156 (-0.076, 0.237) *** | 0.006 (0.002, 0.009) *** |
| SPS                   | -0.230 (-0.344, -0.115) *** | 0.001 (-0.004, 0.006)   | 0.270 (0.120, 0.421) ***  | 0.006 (0.0001, 0.011) *  |
| SIAS                  | -0.239 (-0.361, -0.117) *** | 0.002 (-0.003, 0.008)   | 0.260 (0.100, 0.419) **   | 0.009 (0.003, 0.014) **  |
| <u>Between-Person</u> |                             |                         |                           |                          |
| LSAS                  | -0.207 (-0.312, -0.101) *** | -0.001 (-0.004, 0.003)  | 0.252 (-0.142, 0.362) ^   | 0.006 (0.001, 0.011) *   |
| SPS                   | -0.313 (-0.485, -0.142) *** | 0.001 (-0.005, 0.007)   | 0.316 (0.139, 0.493) ***  | 0.005 (-0.003, 0.013)    |

**Appendix 1** to Rappaport LM, Russell JJ, Hedeker D, Pinard G, Bleau P, Moskowitz DS. Affect, interpersonal behavior and interpersonal perception during open-label, uncontrolled paroxetine treatment of people with social anxiety disorder: a pilot study. *J Psychiatry Neurosci* 2018.

DOI: 10.1503/jpn.170141

Online appendices are unedited and posted as supplied by the authors.

SIAS                      -0.281 (-0.481, -0.081) \*\*      0.001 (-0.006, 0.008)      0.320 (0.104, 0.535) \*\*      0.009 (0.0003, 0.018) \*

Note. LSAS = Liebowitz Social Anxiety Scale; SPS = Social Phobia; SIAS = Social Interaction and Anxiety Scale; MADRS = Montgomery-Åsberg Depression Rating Scale; CI = 95% Confidence Interval. \*  $p \leq 0.05$ , \*\*  $p \leq 0.01$ , \*\*\*  $p \leq 0.001$ , ^  $p \leq 0.0001$ .
